# Supplementary material for: Multi-omic based molecular profiling of advanced cancer identifies treatable targets and improves survival in individual patients
Source: PubMed Central journal article supplement (PMC6205171; doi:10.18632/oncotarget.26198), 2018-10-05
Supplement: oncotarget-09-34794-s001.pdf [file oncotarget-09-34794-s001.pdf]

# **Multi-omic based molecular profiling of advanced cancer identifies treatable targets and improves survival in individual patients**

## **SUPPLEMENTARY MATERIALS**

**Supplementary Table 1: Overview of all unique detected mutations (COSMIC IDs) and the amount of patients who harbored the identified mutation at least once**

See Supplementary File 1
